# Supplementary material for: Brazilian Semi-Arid Mangroves-Associated Microbiome as Pools of Richness and Complexity in a Changing World
Source: Front Microbiol. 2021 Aug 26;12:715991. doi: 10.3389/fmicb.2021.715991 (PMC8427804; doi:10.3389/fmicb.2021.715991)
Supplement: Supplementary file 2 [file Data_Sheet_2.XLSX]

## Sheet: Sheet1
Samples	input	filtered	denoisedF	denoisedR	merged	nonchim
BRA1.1	36394	29185	26362	26346	22594	21437
BRA1.2	88530	34812	32743	34776	23284	21764
BRA1.3	95487	58993	56515	58944	39290	35388
BRA2.1	68730	57848	53147	52654	45746	42009
BRA2.2	128257	75437	70846	75389	37805	35585
BRA2.3	162855	104250	99667	103805	65618	58929
BRA3.1	88058	74243	69902	69290	61288	54614
BRA3.2	229272	143299	137274	143104	78961	70909
BRA3.3	161260	94303	90913	94239	63315	55800
BRA4.1	46861	38784	36511	35905	31814	29440
BRA4.2	196545	115087	110295	115000	74818	68913
BRA4.3	238832	145680	140173	145635	90234	81670
BRA5.1	80290	69057	64145	63333	56300	51518
BRA5.2	193412	114929	110921	114800	81088	76176
BRA5.3	238600	151845	145469	151524	100227	94344
SAL1.1	94875	82345	76936	76082	67096	63914
SAL1.2	92533	51978	48460	51947	28466	26588
SAL1.3	155257	94696	90291	94626	60895	56917
SAL2.1	107169	92096	86569	85694	73942	71760
SAL2.2	91377	77479	72470	71760	62062	60856
SAL2.3	113804	62894	59890	62894	43991	41314
SAL3.1	76388	66946	63002	62186	55803	51173
SAL3.2	86496	52433	49956	52433	35303	32933
SAL3.3	161636	93227	88956	93148	59591	56270
SAL4.1	98161	86081	80637	79846	69950	66127
SAL4.2	152069	89418	85006	89418	58430	54845
SAL4.3	128385	74560	70455	74555	44977	42733
SAL5.1	119443	104200	97911	97013	85900	83011
SAL5.2	102475	50688	44379	50688	915	893
SAL5.3	171992	105188	100120	105007	66900	63623
COC1.1	97146	84113	79508	78633	69693	63644
COC1.2	90802	49118	45158	49118	24179	23355
COC1.3	130789	78829	74551	78829	50501	48518
COC2.1	62645	54399	48641	48088	40497	36881
COC2.2	151175	91413	86200	91345	55178	52450
COC2.3	159412	85726	81590	85721	58193	56062
COC3.1	143090	124032	115764	114754	98708	93078
COC3.2	192380	114010	108572	113930	72361	69041
COC3.3	189291	111248	106664	111179	74951	70274
COC4.1	109465	86579	81265	79914	67287	65032
COC4.2	201966	119303	114996	119303	81614	77693
COC4.3	145856	82366	78267	82356	53179	51456
COC5.1	149401	127020	119771	118607	103157	98746
COC5.2	122252	71398	67550	71391	43734	41554
COC5.3	386836	237788	227021	237577	155368	148271
ICA1.1	78784	64070	58903	58464	50094	48144
ICA1.2	140490	72811	65610	72787	7156	6773
ICA1.3	73400	40260	37663	40206	26261	24461
ICA2.1	107603	91144	84227	83301	71002	68062
ICA2.2	178876	105789	100509	105789	70658	66190
ICA2.3	106702	63819	60810	63802	44052	41108
ICA3.1	110241	93103	86194	84981	73917	68722
ICA3.2	186836	113949	109087	113925	84795	77806
ICA3.3	93033	78487	73833	73102	62841	61586
ICA4.1	134111	114189	106474	105214	91110	84878
ICA4.2	146268	88054	83482	88048	55861	51647
ICA4.3	188126	117046	111437	117036	80606	73781
ICA5.1	113514	94244	87573	86294	74186	68792
ICA5.2	238407	150901	145254	150874	105200	98678
ICA5.3	172062	95029	91082	95029	67968	64093
JAG1.1	116441	98073	89986	89281	76813	71678
JAG1.2	241161	144970	137986	144848	93273	87809
JAG1.3	223628	126907	121540	126720	78996	74628
JAG2.1	94165	80293	73277	72659	61436	56822
JAG2.2	226830	135091	128249	134882	82063	76547
JAG2.3	125006	77283	74272	77283	55886	51914
JAG3.1	87840	73517	68898	68093	59515	54419
JAG3.2	77643	42018	39279	41922	20061	18809
JAG3.3	199583	122389	116948	122284	77411	73436
JAG4.1	71455	56188	52072	51226	43172	41220
JAG4.2	202692	123803	117655	123632	79302	76568
JAG4.3	162905	87881	83349	87872	59448	57944
JAG5.1	146552	124369	115153	114535	99123	87909
JAG5.2	122732	63258	60557	63216	44087	41101
JAG5.3	211877	119270	111770	119262	67560	64597
PAR1.1	104101	84033	79892	78796	70351	65127
PAR1.2	179391	111936	108088	111855	82377	76336
PAR1.3	205108	119110	113906	119021	78279	72970
PAR2.1	107239	89560	83949	83291	72816	69079
PAR2.2	122206	74849	71466	74770	55393	48682
PAR2.3	226862	143123	137152	143051	107668	98461
PAR3.1	166415	145663	136186	135277	120252	110342
PAR3.2	172746	111443	107149	111383	78010	71430
PAR3.3	204894	107791	96389	107721	767	755
PAR4.1	124633	106929	99616	98839	86173	78516
PAR4.2	186117	128413	124435	128339	102835	94491
PAR4.3	101879	63108	60409	63055	49487	44494
PAR5.1	297843	191447	184556	191306	138158	120239
PAR5.2	120227	104653	99058	98166	87995	82899
PAR5.3	130383	113539	108541	107788	98516	89949
GUA1.1	84369	71863	65742	64710	55731	52118
GUA1.2	95139	57462	52901	57462	31157	28523
GUA1.3	65891	34591	32040	34591	20557	19049
GUA2.1	29917	21947	19246	18995	15439	14927
GUA2.2	164310	97110	92016	97032	54819	49158
GUA2.3	111302	65130	61839	65072	39201	35479
GUA3.1	111451	94296	87493	86509	75988	69783
GUA3.2	179807	107723	102244	107715	67399	61898
GUA3.3	164816	99422	93633	99322	57376	52372
GUA4.1	62652	52187	48078	47008	41117	38037
GUA4.2	108817	65885	62274	65875	45786	42978
GUA4.3	139444	84284	81451	84198	68950	64758
GUA5.1	160015	141436	132108	130519	114291	105467
GUA5.2	104668	62438	58566	62438	41724	38770
GUA5.3	158413	89625	85897	89625	68491	64336
